# Supplementary material for: Y-Box Binding Protein 1 Interacts with Dengue Virus Nucleocapsid and Mediates Viral Assembly
Source: PubMed Central journal article supplement (PMC8903895; doi:10.1128/mbio.00196-22), 2022-02-22
Supplement: mbio.00196-22-st001.pdf [file mbio.00196-22-st001.pdf]

**Supplemental material.**

**Supplementary table S1.** List of antibodies used.

| <b>Antibody</b> | <b>Provider</b>          | <b>Application</b> | <b>Dilution / quantity</b> |
|-----------------|--------------------------|--------------------|----------------------------|
| YBX1            | Thermo Fisher Scientific | WB, IF             | 1:1000, 1:500              |
| YBX1            | Abcam                    | RNA-IP             | 5 µg                       |
| Actin           | Thermo Fisher Scientific | WB                 | 1:2000                     |
| dsRNA (J2)      | Scicons                  | IF, PLA            | 1:500; 1:4000              |
| Envelope        | Invitrogen               | WB, IF, PLA        | 1:2000, 1:1000, 1:4000     |
| Capsid          | Thermo Fisher Scientific | WB                 | 1:1000                     |
| Capsid          | Abcam                    | RNA-IP             | 5 µg                       |
| prM             | Genetex                  | WB, PLA            | 1:1000, 1:4000             |
| Rabbit IgG      | Abcam                    | RNA-IP             | 5 µg                       |
| Calnexin        | BD Biosciences           | WB                 | 1:1000                     |
| NS1             | Abcam                    | WB                 | 1:1000                     |
| Hsp90           | Invitrogen               | WB                 | 1:1000                     |
| CD63            | Santa Cruz               | WB                 | 1:500                      |

*WB: western blot; RNA-IP: RNA immunoprecipitation; IF: immunofluorescence; PLA: proximity ligation assay.*
